# Supplementary material for: Identifying Cancer genes by combining two-rounds RWR based on multiple biological data
Source: BMC Bioinformatics. 2019 Nov 25;20(Suppl 18):518. doi: 10.1186/s12859-019-3123-8 (PMC6876101; doi:10.1186/s12859-019-3123-8)
Supplement: Supplementary file 2 — Additional file 2. It contains all detailed results to describe the effect of parameters. [file 12859_2019_3123_MOESM2_ESM.xlsx]

## Sheet: Sheet1
δ	η	σ	γ	α	AUC
0.5	0.25	0.2	0.1	0	0.89605
0.5	0.25	0.2	0.1	0.1	0.897835
0.5	0.25	0.2	0.1	0.2	0.898265
0.5	0.25	0.2	0.1	0.3	0.898343
0.5	0.25	0.2	0.1	0.4	0.898362
0.5	0.25	0.2	0.1	0.5	0.898456
0.5	0.25	0.2	0.1	0.6	0.89815
0.5	0.25	0.2	0.1	0.7	0.897566
0.5	0.25	0.2	0.1	0.8	0.897278
0.5	0.25	0.2	0.1	0.9	0.896385
0.5	0.25	0.2	0.1	1	0.898534
0.5	0.25	0.2	0.2	0	0.900433
0.5	0.25	0.2	0.2	0.1	0.902364
0.5	0.25	0.2	0.2	0.2	0.902794
0.5	0.25	0.2	0.2	0.3	0.903182
0.5	0.25	0.2	0.2	0.4	0.90349
0.5	0.25	0.2	0.2	0.5	0.903634
0.5	0.25	0.2	0.2	0.6	0.903586
0.5	0.25	0.2	0.2	0.7	0.903137
0.5	0.25	0.2	0.2	0.8	0.902876
0.5	0.25	0.2	0.2	0.9	0.902024
0.5	0.25	0.2	0.2	1	0.90297
0.5	0.25	0.2	0.3	0	0.902707
0.5	0.25	0.2	0.3	0.1	0.905202
0.5	0.25	0.2	0.3	0.2	0.90593
0.5	0.25	0.2	0.3	0.3	0.906189
0.5	0.25	0.2	0.3	0.4	0.906841
0.5	0.25	0.2	0.3	0.5	0.906999
0.5	0.25	0.2	0.3	0.6	0.907262
0.5	0.25	0.2	0.3	0.7	0.907417
0.5	0.25	0.2	0.3	0.8	0.907026
0.5	0.25	0.2	0.3	0.9	0.905993
0.5	0.25	0.2	0.3	1	0.905836
0.5	0.25	0.2	0.4	0	0.903892
0.5	0.25	0.2	0.4	0.1	0.906791
0.5	0.25	0.2	0.4	0.2	0.907616
0.5	0.25	0.2	0.4	0.3	0.908406
0.5	0.25	0.2	0.4	0.4	0.908648
0.5	0.25	0.2	0.4	0.5	0.908978
0.5	0.25	0.2	0.4	0.6	0.909277
0.5	0.25	0.2	0.4	0.7	0.909804
0.5	0.25	0.2	0.4	0.8	0.909557
0.5	0.25	0.2	0.4	0.9	0.908558
0.5	0.25	0.2	0.4	1	0.9089
0.5	0.25	0.2	0.5	0	0.904651
0.5	0.25	0.2	0.5	0.1	0.907556
0.5	0.25	0.2	0.5	0.2	0.908439
0.5	0.25	0.2	0.5	0.3	0.909101
0.5	0.25	0.2	0.5	0.4	0.909575
0.5	0.25	0.2	0.5	0.5	0.909817
0.5	0.25	0.2	0.5	0.6	0.90976
0.5	0.25	0.2	0.5	0.7	0.910647
0.5	0.25	0.2	0.5	0.8	0.910774
0.5	0.25	0.2	0.5	0.9	0.910088
0.5	0.25	0.2	0.5	1	0.906625
0.5	0.25	0.2	0.6	0	0.90503
0.5	0.25	0.2	0.6	0.1	0.907694
0.5	0.25	0.2	0.6	0.2	0.908728
0.5	0.25	0.2	0.6	0.3	0.909148
0.5	0.25	0.2	0.6	0.4	0.909696
0.5	0.25	0.2	0.6	0.5	0.909793
0.5	0.25	0.2	0.6	0.6	0.910083
0.5	0.25	0.2	0.6	0.7	0.91051
0.5	0.25	0.2	0.6	0.8	0.910853
0.5	0.25	0.2	0.6	0.9	0.911016
0.5	0.25	0.2	0.6	1	0.905208
0.5	0.25	0.2	0.7	0	0.905497
0.5	0.25	0.2	0.7	0.1	0.908161
0.5	0.25	0.2	0.7	0.2	0.908977
0.5	0.25	0.2	0.7	0.3	0.909518
0.5	0.25	0.2	0.7	0.4	0.909703
0.5	0.25	0.2	0.7	0.5	0.91013
0.5	0.25	0.2	0.7	0.6	0.910154
0.5	0.25	0.2	0.7	0.7	0.910816
0.5	0.25	0.2	0.7	0.8	0.91138
0.5	0.25	0.2	0.7	0.9	0.911795
0.5	0.25	0.2	0.7	1	0.904729
0.5	0.25	0.2	0.8	0	0.905383
0.5	0.25	0.2	0.8	0.1	0.907523
0.5	0.25	0.2	0.8	0.2	0.908508
0.5	0.25	0.2	0.8	0.3	0.909219
0.5	0.25	0.2	0.8	0.4	0.909428
0.5	0.25	0.2	0.8	0.5	0.910268
0.5	0.25	0.2	0.8	0.6	0.910315
0.5	0.25	0.2	0.8	0.7	0.91088
0.5	0.25	0.2	0.8	0.8	0.911219
0.5	0.25	0.2	0.8	0.9	0.911702
0.5	0.25	0.2	0.8	1	0.904751
0.5	0.25	0.2	0.9	0	0.904717
0.5	0.25	0.2	0.9	0.1	0.906505
0.5	0.25	0.2	0.9	0.2	0.907046
0.5	0.25	0.2	0.9	0.3	0.907328
0.5	0.25	0.2	0.9	0.4	0.907668
0.5	0.25	0.2	0.9	0.5	0.908467
0.5	0.25	0.2	0.9	0.6	0.908571
0.5	0.25	0.2	0.9	0.7	0.909032
0.5	0.25	0.2	0.9	0.8	0.90958
0.5	0.25	0.2	0.9	0.9	0.909983
0.5	0.25	0.2	0.9	1	0.901536
0.5	0.25	0.3	0.1	0	0.89605
0.5	0.25	0.3	0.1	0.1	0.898256
0.5	0.25	0.3	0.1	0.2	0.898945
0.5	0.25	0.3	0.1	0.3	0.899257
0.5	0.25	0.3	0.1	0.4	0.899534
0.5	0.25	0.3	0.1	0.5	0.899866
0.5	0.25	0.3	0.1	0.6	0.899769
0.5	0.25	0.3	0.1	0.7	0.899495
0.5	0.25	0.3	0.1	0.8	0.899461
0.5	0.25	0.3	0.1	0.9	0.898779
0.5	0.25	0.3	0.1	1	0.902406
0.5	0.25	0.3	0.2	0	0.900433
0.5	0.25	0.3	0.2	0.1	0.902928
0.5	0.25	0.3	0.2	0.2	0.90368
0.5	0.25	0.3	0.2	0.3	0.90445
0.5	0.25	0.3	0.2	0.4	0.904685
0.5	0.25	0.3	0.2	0.5	0.905168
0.5	0.25	0.3	0.2	0.6	0.904743
0.5	0.25	0.3	0.2	0.7	0.904708
0.5	0.25	0.3	0.2	0.8	0.904584
0.5	0.25	0.3	0.2	0.9	0.903461
0.5	0.25	0.3	0.2	1	0.905758
0.5	0.25	0.3	0.3	0	0.902707
0.5	0.25	0.3	0.3	0.1	0.905202
0.5	0.25	0.3	0.3	0.2	0.906253
0.5	0.25	0.3	0.3	0.3	0.906592
0.5	0.25	0.3	0.3	0.4	0.906898
0.5	0.25	0.3	0.3	0.5	0.907216
0.5	0.25	0.3	0.3	0.6	0.907726
0.5	0.25	0.3	0.3	0.7	0.90766
0.5	0.25	0.3	0.3	0.8	0.907275
0.5	0.25	0.3	0.3	0.9	0.906669
0.5	0.25	0.3	0.3	1	0.90514
0.5	0.25	0.3	0.4	0	0.903892
0.5	0.25	0.3	0.4	0.1	0.906629
0.5	0.25	0.3	0.4	0.2	0.907213
0.5	0.25	0.3	0.4	0.3	0.90768
0.5	0.25	0.3	0.4	0.4	0.908302
0.5	0.25	0.3	0.4	0.5	0.908414
0.5	0.25	0.3	0.4	0.6	0.908608
0.5	0.25	0.3	0.4	0.7	0.909081
0.5	0.25	0.3	0.4	0.8	0.908968
0.5	0.25	0.3	0.4	0.9	0.907701
0.5	0.25	0.3	0.4	1	0.903927
0.5	0.25	0.3	0.5	0	0.904651
0.5	0.25	0.3	0.5	0.1	0.907258
0.5	0.25	0.3	0.5	0.2	0.908439
0.5	0.25	0.3	0.5	0.3	0.908697
0.5	0.25	0.3	0.5	0.4	0.909091
0.5	0.25	0.3	0.5	0.5	0.90931
0.5	0.25	0.3	0.5	0.6	0.90968
0.5	0.25	0.3	0.5	0.7	0.909922
0.5	0.25	0.3	0.5	0.8	0.9098
0.5	0.25	0.3	0.5	0.9	0.909641
0.5	0.25	0.3	0.5	1	0.904086
0.5	0.25	0.3	0.6	0	0.90503
0.5	0.25	0.3	0.6	0.1	0.908097
0.5	0.25	0.3	0.6	0.2	0.909373
0.5	0.25	0.3	0.6	0.3	0.909551
0.5	0.25	0.3	0.6	0.4	0.910341
0.5	0.25	0.3	0.6	0.5	0.910358
0.5	0.25	0.3	0.6	0.6	0.910994
0.5	0.25	0.3	0.6	0.7	0.911074
0.5	0.25	0.3	0.6	0.8	0.911175
0.5	0.25	0.3	0.6	0.9	0.912008
0.5	0.25	0.3	0.6	1	0.90664
0.5	0.25	0.3	0.7	0	0.905497
0.5	0.25	0.3	0.7	0.1	0.908806
0.5	0.25	0.3	0.7	0.2	0.90938
0.5	0.25	0.3	0.7	0.3	0.910163
0.5	0.25	0.3	0.7	0.4	0.910509
0.5	0.25	0.3	0.7	0.5	0.91059
0.5	0.25	0.3	0.7	0.6	0.911218
0.5	0.25	0.3	0.7	0.7	0.911379
0.5	0.25	0.3	0.7	0.8	0.912025
0.5	0.25	0.3	0.7	0.9	0.912579
0.5	0.25	0.3	0.7	1	0.906579
0.5	0.25	0.3	0.8	0	0.905383
0.5	0.25	0.3	0.8	0.1	0.907869
0.5	0.25	0.3	0.8	0.2	0.908669
0.5	0.25	0.3	0.8	0.3	0.909703
0.5	0.25	0.3	0.8	0.4	0.909428
0.5	0.25	0.3	0.8	0.5	0.910751
0.5	0.25	0.3	0.8	0.6	0.910718
0.5	0.25	0.3	0.8	0.7	0.91104
0.5	0.25	0.3	0.8	0.8	0.911678
0.5	0.25	0.3	0.8	0.9	0.912161
0.5	0.25	0.3	0.8	1	0.90513
0.5	0.25	0.3	0.9	0	0.904717
0.5	0.25	0.3	0.9	0.1	0.90761
0.5	0.25	0.3	0.9	0.2	0.90807
0.5	0.25	0.3	0.9	0.3	0.908595
0.5	0.25	0.3	0.9	0.4	0.908853
0.5	0.25	0.3	0.9	0.5	0.909491
0.5	0.25	0.3	0.9	0.6	0.909757
0.5	0.25	0.3	0.9	0.7	0.910193
0.5	0.25	0.3	0.9	0.8	0.910499
0.5	0.25	0.3	0.9	0.9	0.911064
0.5	0.25	0.3	0.9	1	0.902319
0.5	0.25	0.4	0.1	0	0.89605
0.5	0.25	0.4	0.1	0.1	0.89858
0.5	0.25	0.4	0.1	0.2	0.899359
0.5	0.25	0.4	0.1	0.3	0.899919
0.5	0.25	0.4	0.1	0.4	0.900121
0.5	0.25	0.4	0.1	0.5	0.900503
0.5	0.25	0.4	0.1	0.6	0.900356
0.5	0.25	0.4	0.1	0.7	0.900389
0.5	0.25	0.4	0.1	0.8	0.899867
0.5	0.25	0.4	0.1	0.9	0.899096
0.5	0.25	0.4	0.1	1	0.900775
0.5	0.25	0.4	0.2	0	0.900433
0.5	0.25	0.4	0.2	0.1	0.902686
0.5	0.25	0.4	0.2	0.2	0.903438
0.5	0.25	0.4	0.2	0.3	0.904131
0.5	0.25	0.4	0.2	0.4	0.904618
0.5	0.25	0.4	0.2	0.5	0.904873
0.5	0.25	0.4	0.2	0.6	0.904364
0.5	0.25	0.4	0.2	0.7	0.904163
0.5	0.25	0.4	0.2	0.8	0.903799
0.5	0.25	0.4	0.2	0.9	0.90304
0.5	0.25	0.4	0.2	1	0.901234
0.5	0.25	0.4	0.3	0	0.902707
0.5	0.25	0.4	0.3	0.1	0.905928
0.5	0.25	0.4	0.3	0.2	0.907543
0.5	0.25	0.4	0.3	0.3	0.907721
0.5	0.25	0.4	0.3	0.4	0.90843
0.5	0.25	0.4	0.3	0.5	0.908612
0.5	0.25	0.4	0.3	0.6	0.909073
0.5	0.25	0.4	0.3	0.7	0.90952
0.5	0.25	0.4	0.3	0.8	0.908827
0.5	0.25	0.4	0.3	0.9	0.908173
0.5	0.25	0.4	0.3	1	0.906868
0.5	0.25	0.4	0.4	0	0.903892
0.5	0.25	0.4	0.4	0.1	0.908
0.5	0.25	0.4	0.4	0.2	0.909124
0.5	0.25	0.4	0.4	0.3	0.909874
0.5	0.25	0.4	0.4	0.4	0.910721
0.5	0.25	0.4	0.4	0.5	0.910833
0.5	0.25	0.4	0.4	0.6	0.911511
0.5	0.25	0.4	0.4	0.7	0.91206
0.5	0.25	0.4	0.4	0.8	0.911944
0.5	0.25	0.4	0.4	0.9	0.911122
0.5	0.25	0.4	0.4	1	0.909163
0.5	0.25	0.4	0.5	0	0.904651
0.5	0.25	0.4	0.5	0.1	0.908604
0.5	0.25	0.4	0.5	0.2	0.910213
0.5	0.25	0.4	0.5	0.3	0.910737
0.5	0.25	0.4	0.5	0.4	0.911349
0.5	0.25	0.4	0.5	0.5	0.911809
0.5	0.25	0.4	0.5	0.6	0.911938
0.5	0.25	0.4	0.5	0.7	0.912583
0.5	0.25	0.4	0.5	0.8	0.91302
0.5	0.25	0.4	0.5	0.9	0.912685
0.5	0.25	0.4	0.5	1	0.909367
0.5	0.25	0.4	0.6	0	0.90503
0.5	0.25	0.4	0.6	0.1	0.908983
0.5	0.25	0.4	0.6	0.2	0.910905
0.5	0.25	0.4	0.6	0.3	0.911003
0.5	0.25	0.4	0.6	0.4	0.91193
0.5	0.25	0.4	0.6	0.5	0.912132
0.5	0.25	0.4	0.6	0.6	0.912284
0.5	0.25	0.4	0.6	0.7	0.912848
0.5	0.25	0.4	0.6	0.8	0.913272
0.5	0.25	0.4	0.6	0.9	0.913281
0.5	0.25	0.4	0.6	1	0.909435
0.5	0.25	0.4	0.7	0	0.905497
0.5	0.25	0.4	0.7	0.1	0.909693
0.5	0.25	0.4	0.7	0.2	0.910428
0.5	0.25	0.4	0.7	0.3	0.911453
0.5	0.25	0.4	0.7	0.4	0.911856
0.5	0.25	0.4	0.7	0.5	0.912041
0.5	0.25	0.4	0.7	0.6	0.912428
0.5	0.25	0.4	0.7	0.7	0.912266
0.5	0.25	0.4	0.7	0.8	0.912992
0.5	0.25	0.4	0.7	0.9	0.913789
0.5	0.25	0.4	0.7	1	0.907496
0.5	0.25	0.4	0.8	0	0.905383
0.5	0.25	0.4	0.8	0.1	0.908756
0.5	0.25	0.4	0.8	0.2	0.909556
0.5	0.25	0.4	0.8	0.3	0.91059
0.5	0.25	0.4	0.8	0.4	0.910799
0.5	0.25	0.4	0.8	0.5	0.911397
0.5	0.25	0.4	0.8	0.6	0.911766
0.5	0.25	0.4	0.8	0.7	0.911766
0.5	0.25	0.4	0.8	0.8	0.912404
0.5	0.25	0.4	0.8	0.9	0.912725
0.5	0.25	0.4	0.8	1	0.902952
0.5	0.25	0.4	0.9	0	0.904717
0.5	0.25	0.4	0.9	0.1	0.908336
0.5	0.25	0.4	0.9	0.2	0.90928
0.5	0.25	0.4	0.9	0.3	0.909885
0.5	0.25	0.4	0.9	0.4	0.910328
0.5	0.25	0.4	0.9	0.5	0.911265
0.5	0.25	0.4	0.9	0.6	0.911289
0.5	0.25	0.4	0.9	0.7	0.911645
0.5	0.25	0.4	0.9	0.8	0.912031
0.5	0.25	0.4	0.9	0.9	0.912596
0.5	0.25	0.4	0.9	1	0.902749
0.5	0.25	0.5	0.1	0	0.89605
0.5	0.25	0.5	0.1	0.1	0.899147
0.5	0.25	0.5	0.1	0.2	0.900499
0.5	0.25	0.5	0.1	0.3	0.901222
0.5	0.25	0.5	0.1	0.4	0.901449
0.5	0.25	0.5	0.1	0.5	0.902049
0.5	0.25	0.5	0.1	0.6	0.901821
0.5	0.25	0.5	0.1	0.7	0.901788
0.5	0.25	0.5	0.1	0.8	0.901256
0.5	0.25	0.5	0.1	0.9	0.900794
0.5	0.25	0.5	0.1	1	0.902938
0.5	0.25	0.5	0.2	0	0.900433
0.5	0.25	0.5	0.2	0.1	0.904541
0.5	0.25	0.5	0.2	0.2	0.90618
0.5	0.25	0.5	0.2	0.3	0.907116
0.5	0.25	0.5	0.2	0.4	0.908009
0.5	0.25	0.5	0.2	0.5	0.908574
0.5	0.25	0.5	0.2	0.6	0.908578
0.5	0.25	0.5	0.2	0.7	0.908693
0.5	0.25	0.5	0.2	0.8	0.908637
0.5	0.25	0.5	0.2	0.9	0.908107
0.5	0.25	0.5	0.2	1	0.909738
0.5	0.25	0.5	0.3	0	0.902707
0.5	0.25	0.5	0.3	0.1	0.906734
0.5	0.25	0.5	0.3	0.2	0.908833
0.5	0.25	0.5	0.3	0.3	0.909252
0.5	0.25	0.5	0.3	0.4	0.909962
0.5	0.25	0.5	0.3	0.5	0.910306
0.5	0.25	0.5	0.3	0.6	0.9111
0.5	0.25	0.5	0.3	0.7	0.911529
0.5	0.25	0.5	0.3	0.8	0.91111
0.5	0.25	0.5	0.3	0.9	0.910522
0.5	0.25	0.5	0.3	1	0.909496
0.5	0.25	0.5	0.4	0	0.903892
0.5	0.25	0.5	0.4	0.1	0.908242
0.5	0.25	0.5	0.4	0.2	0.909769
0.5	0.25	0.5	0.4	0.3	0.910358
0.5	0.25	0.5	0.4	0.4	0.911205
0.5	0.25	0.5	0.4	0.5	0.911881
0.5	0.25	0.5	0.4	0.6	0.912156
0.5	0.25	0.5	0.4	0.7	0.913036
0.5	0.25	0.5	0.4	0.8	0.912847
0.5	0.25	0.5	0.4	0.9	0.912272
0.5	0.25	0.5	0.4	1	0.910118
0.5	0.25	0.5	0.5	0	0.904651
0.5	0.25	0.5	0.5	0.1	0.908604
0.5	0.25	0.5	0.5	0.2	0.910374
0.5	0.25	0.5	0.5	0.3	0.91114
0.5	0.25	0.5	0.5	0.4	0.911591
0.5	0.25	0.5	0.5	0.5	0.912132
0.5	0.25	0.5	0.5	0.6	0.912398
0.5	0.25	0.5	0.5	0.7	0.912825
0.5	0.25	0.5	0.5	0.8	0.913671
0.5	0.25	0.5	0.5	0.9	0.913079
0.5	0.25	0.5	0.5	1	0.909382
0.5	0.25	0.5	0.6	0	0.90503
0.5	0.25	0.5	0.6	0.1	0.909064
0.5	0.25	0.5	0.6	0.2	0.910582
0.5	0.25	0.5	0.6	0.3	0.911083
0.5	0.25	0.5	0.6	0.4	0.91193
0.5	0.25	0.5	0.6	0.5	0.912293
0.5	0.25	0.5	0.6	0.6	0.912824
0.5	0.25	0.5	0.6	0.7	0.912687
0.5	0.25	0.5	0.6	0.8	0.913513
0.5	0.25	0.5	0.6	0.9	0.913606
0.5	0.25	0.5	0.6	1	0.908221
0.5	0.25	0.5	0.7	0	0.905497
0.5	0.25	0.5	0.7	0.1	0.909531
0.5	0.25	0.5	0.7	0.2	0.910428
0.5	0.25	0.5	0.7	0.3	0.911453
0.5	0.25	0.5	0.7	0.4	0.911937
0.5	0.25	0.5	0.7	0.5	0.912202
0.5	0.25	0.5	0.7	0.6	0.91275
0.5	0.25	0.5	0.7	0.7	0.912508
0.5	0.25	0.5	0.7	0.8	0.913637
0.5	0.25	0.5	0.7	0.9	0.914432
0.5	0.25	0.5	0.7	1	0.906915
0.5	0.25	0.5	0.8	0	0.905383
0.5	0.25	0.5	0.8	0.1	0.908676
0.5	0.25	0.5	0.8	0.2	0.909475
0.5	0.25	0.5	0.8	0.3	0.910831
0.5	0.25	0.5	0.8	0.4	0.911258
0.5	0.25	0.5	0.8	0.5	0.912041
0.5	0.25	0.5	0.8	0.6	0.91225
0.5	0.25	0.5	0.8	0.7	0.912652
0.5	0.25	0.5	0.8	0.8	0.913774
0.5	0.25	0.5	0.8	0.9	0.914176
0.5	0.25	0.5	0.8	1	0.906544
0.5	0.25	0.5	0.9	0	0.904717
0.5	0.25	0.5	0.9	0.1	0.908256
0.5	0.25	0.5	0.9	0.2	0.909039
0.5	0.25	0.5	0.9	0.3	0.909724
0.5	0.25	0.5	0.9	0.4	0.910329
0.5	0.25	0.5	0.9	0.5	0.911024
0.5	0.25	0.5	0.9	0.6	0.91129
0.5	0.25	0.5	0.9	0.7	0.911807
0.5	0.25	0.5	0.9	0.8	0.912515
0.5	0.25	0.5	0.9	0.9	0.913886
0.5	0.25	0.5	0.9	1	0.906579
0.5	0.25	0.6	0.1	0	0.89605
0.5	0.25	0.6	0.1	0.1	0.899633
0.5	0.25	0.6	0.1	0.2	0.901307
0.5	0.25	0.6	0.1	0.3	0.902357
0.5	0.25	0.6	0.1	0.4	0.902742
0.5	0.25	0.6	0.1	0.5	0.90367
0.5	0.25	0.6	0.1	0.6	0.903522
0.5	0.25	0.6	0.1	0.7	0.903649
0.5	0.25	0.6	0.1	0.8	0.903441
0.5	0.25	0.6	0.1	0.9	0.902803
0.5	0.25	0.6	0.1	1	0.903262
0.5	0.25	0.6	0.2	0	0.900433
0.5	0.25	0.6	0.2	0.1	0.90446
0.5	0.25	0.6	0.2	0.2	0.906042
0.5	0.25	0.6	0.2	0.3	0.906955
0.5	0.25	0.6	0.2	0.4	0.908172
0.5	0.25	0.6	0.2	0.5	0.908664
0.5	0.25	0.6	0.2	0.6	0.90875
0.5	0.25	0.6	0.2	0.7	0.908622
0.5	0.25	0.6	0.2	0.8	0.908567
0.5	0.25	0.6	0.2	0.9	0.908354
0.5	0.25	0.6	0.2	1	0.907802
0.5	0.25	0.6	0.3	0	0.902707
0.5	0.25	0.6	0.3	0.1	0.906815
0.5	0.25	0.6	0.3	0.2	0.908591
0.5	0.25	0.6	0.3	0.3	0.909414
0.5	0.25	0.6	0.3	0.4	0.909881
0.5	0.25	0.6	0.3	0.5	0.910387
0.5	0.25	0.6	0.3	0.6	0.911102
0.5	0.25	0.6	0.3	0.7	0.91154
0.5	0.25	0.6	0.3	0.8	0.911183
0.5	0.25	0.6	0.3	0.9	0.910455
0.5	0.25	0.6	0.3	1	0.908603
0.5	0.25	0.6	0.4	0	0.903892
0.5	0.25	0.6	0.4	0.1	0.908242
0.5	0.25	0.6	0.4	0.2	0.90985
0.5	0.25	0.6	0.4	0.3	0.910277
0.5	0.25	0.6	0.4	0.4	0.911044
0.5	0.25	0.6	0.4	0.5	0.91172
0.5	0.25	0.6	0.4	0.6	0.912075
0.5	0.25	0.6	0.4	0.7	0.912801
0.5	0.25	0.6	0.4	0.8	0.912611
0.5	0.25	0.6	0.4	0.9	0.911726
0.5	0.25	0.6	0.4	1	0.908269
0.5	0.25	0.6	0.5	0	0.904651
0.5	0.25	0.6	0.5	0.1	0.908766
0.5	0.25	0.6	0.5	0.2	0.910374
0.5	0.25	0.6	0.5	0.3	0.911059
0.5	0.25	0.6	0.5	0.4	0.91151
0.5	0.25	0.6	0.5	0.5	0.911994
0.5	0.25	0.6	0.5	0.6	0.912479
0.5	0.25	0.6	0.5	0.7	0.912422
0.5	0.25	0.6	0.5	0.8	0.913195
0.5	0.25	0.6	0.5	0.9	0.912692
0.5	0.25	0.6	0.5	1	0.907476
0.5	0.25	0.6	0.6	0	0.906061
0.5	0.25	0.6	0.6	0.1	0.910202
0.5	0.25	0.6	0.6	0.2	0.911825
0.5	0.25	0.6	0.6	0.3	0.913172
0.5	0.25	0.6	0.6	0.4	0.913633
0.5	0.25	0.6	0.6	0.5	0.914785
0.5	0.25	0.6	0.6	0.6	0.915236
0.5	0.25	0.6	0.6	0.7	0.915824
0.5	0.25	0.6	0.6	0.8	0.916953
0.5	0.25	0.6	0.6	0.9	0.917784
0.5	0.25	0.6	0.6	1	0.913827
0.5	0.25	0.6	0.7	0	0.905497
0.5	0.25	0.6	0.7	0.1	0.909773
0.5	0.25	0.6	0.7	0.2	0.910993
0.5	0.25	0.6	0.7	0.3	0.911937
0.5	0.25	0.6	0.7	0.4	0.912501
0.5	0.25	0.6	0.7	0.5	0.913009
0.5	0.25	0.6	0.7	0.6	0.913637
0.5	0.25	0.6	0.7	0.7	0.91396
0.5	0.25	0.6	0.7	0.8	0.914928
0.5	0.25	0.6	0.7	0.9	0.915965
0.5	0.25	0.6	0.7	1	0.910933
0.5	0.25	0.6	0.8	0	0.905383
0.5	0.25	0.6	0.8	0.1	0.908918
0.5	0.25	0.6	0.8	0.2	0.909958
0.5	0.25	0.6	0.8	0.3	0.911154
0.5	0.25	0.6	0.8	0.4	0.91142
0.5	0.25	0.6	0.8	0.5	0.912065
0.5	0.25	0.6	0.8	0.6	0.912573
0.5	0.25	0.6	0.8	0.7	0.913298
0.5	0.25	0.6	0.8	0.8	0.913936
0.5	0.25	0.6	0.8	0.9	0.914821
0.5	0.25	0.6	0.8	1	0.909032
0.5	0.25	0.6	0.9	0	0.904717
0.5	0.25	0.6	0.9	0.1	0.908175
0.5	0.25	0.6	0.9	0.2	0.909039
0.5	0.25	0.6	0.9	0.3	0.909724
0.5	0.25	0.6	0.9	0.4	0.910329
0.5	0.25	0.6	0.9	0.5	0.911024
0.5	0.25	0.6	0.9	0.6	0.911451
0.5	0.25	0.6	0.9	0.7	0.911645
0.5	0.25	0.6	0.9	0.8	0.912596
0.5	0.25	0.6	0.9	0.9	0.913403
0.5	0.25	0.6	0.9	1	0.907271
0.5	0.25	0.7	0.1	0	0.89605
0.5	0.25	0.7	0.1	0.1	0.899956
0.5	0.25	0.7	0.1	0.2	0.901471
0.5	0.25	0.7	0.1	0.3	0.902362
0.5	0.25	0.7	0.1	0.4	0.903068
0.5	0.25	0.7	0.1	0.5	0.903995
0.5	0.25	0.7	0.1	0.6	0.903926
0.5	0.25	0.7	0.1	0.7	0.903976
0.5	0.25	0.7	0.1	0.8	0.904247
0.5	0.25	0.7	0.1	0.9	0.903454
0.5	0.25	0.7	0.1	1	0.904149
0.5	0.25	0.7	0.2	0	0.900433
0.5	0.25	0.7	0.2	0.1	0.904541
0.5	0.25	0.7	0.2	0.2	0.906203
0.5	0.25	0.7	0.2	0.3	0.907439
0.5	0.25	0.7	0.2	0.4	0.908495
0.5	0.25	0.7	0.2	0.5	0.90899
0.5	0.25	0.7	0.2	0.6	0.909322
0.5	0.25	0.7	0.2	0.7	0.909515
0.5	0.25	0.7	0.2	0.8	0.909562
0.5	0.25	0.7	0.2	0.9	0.909576
0.5	0.25	0.7	0.2	1	0.909254
0.5	0.25	0.7	0.3	0	0.902707
0.5	0.25	0.7	0.3	0.1	0.907056
0.5	0.25	0.7	0.3	0.2	0.909155
0.5	0.25	0.7	0.3	0.3	0.910139
0.5	0.25	0.7	0.3	0.4	0.91101
0.5	0.25	0.7	0.3	0.5	0.911757
0.5	0.25	0.7	0.3	0.6	0.912234
0.5	0.25	0.7	0.3	0.7	0.913158
0.5	0.25	0.7	0.3	0.8	0.913046
0.5	0.25	0.7	0.3	0.9	0.912796
0.5	0.25	0.7	0.3	1	0.910862
0.5	0.25	0.7	0.4	0	0.903892
0.5	0.25	0.7	0.4	0.1	0.908403
0.5	0.25	0.7	0.4	0.2	0.910253
0.5	0.25	0.7	0.4	0.3	0.911083
0.5	0.25	0.7	0.4	0.4	0.912011
0.5	0.25	0.7	0.4	0.5	0.912848
0.5	0.25	0.7	0.4	0.6	0.913526
0.5	0.25	0.7	0.4	0.7	0.914413
0.5	0.25	0.7	0.4	0.8	0.914712
0.5	0.25	0.7	0.4	0.9	0.914393
0.5	0.25	0.7	0.4	1	0.91182
0.5	0.25	0.7	0.5	0	0.904651
0.5	0.25	0.7	0.5	0.1	0.908927
0.5	0.25	0.7	0.5	0.2	0.910938
0.5	0.25	0.7	0.5	0.3	0.911704
0.5	0.25	0.7	0.5	0.4	0.912397
0.5	0.25	0.7	0.5	0.5	0.913123
0.5	0.25	0.7	0.5	0.6	0.91401
0.5	0.25	0.7	0.5	0.7	0.914356
0.5	0.25	0.7	0.5	0.8	0.915695
0.5	0.25	0.7	0.5	0.9	0.915603
0.5	0.25	0.7	0.5	1	0.911585
0.5	0.25	0.7	0.6	0	0.90503
0.5	0.25	0.7	0.6	0.1	0.909225
0.5	0.25	0.7	0.6	0.2	0.910824
0.5	0.25	0.7	0.6	0.3	0.911406
0.5	0.25	0.7	0.6	0.4	0.912414
0.5	0.25	0.7	0.6	0.5	0.912639
0.5	0.25	0.7	0.6	0.6	0.913389
0.5	0.25	0.7	0.6	0.7	0.913574
0.5	0.25	0.7	0.6	0.8	0.914643
0.5	0.25	0.7	0.6	0.9	0.914905
0.5	0.25	0.7	0.6	1	0.910787
0.5	0.25	0.7	0.7	0	0.905497
0.5	0.25	0.7	0.7	0.1	0.909854
0.5	0.25	0.7	0.7	0.2	0.91067
0.5	0.25	0.7	0.7	0.3	0.911373
0.5	0.25	0.7	0.7	0.4	0.911695
0.5	0.25	0.7	0.7	0.5	0.912687
0.5	0.25	0.7	0.7	0.6	0.913073
0.5	0.25	0.7	0.7	0.7	0.913235
0.5	0.25	0.7	0.7	0.8	0.914202
0.5	0.25	0.7	0.7	0.9	0.915159
0.5	0.25	0.7	0.7	1	0.909243
0.5	0.25	0.7	0.8	0	0.905383
0.5	0.25	0.7	0.8	0.1	0.908918
0.5	0.25	0.7	0.8	0.2	0.909717
0.5	0.25	0.7	0.8	0.3	0.910832
0.5	0.25	0.7	0.8	0.4	0.911017
0.5	0.25	0.7	0.8	0.5	0.911824
0.5	0.25	0.7	0.8	0.6	0.911928
0.5	0.25	0.7	0.8	0.7	0.912734
0.5	0.25	0.7	0.8	0.8	0.913453
0.5	0.25	0.7	0.8	0.9	0.914419
0.5	0.25	0.7	0.8	1	0.907734
0.5	0.25	0.7	0.9	0	0.904717
0.5	0.25	0.7	0.9	0.1	0.908095
0.5	0.25	0.7	0.9	0.2	0.908878
0.5	0.25	0.7	0.9	0.3	0.909563
0.5	0.25	0.7	0.9	0.4	0.909926
0.5	0.25	0.7	0.9	0.5	0.910782
0.5	0.25	0.7	0.9	0.6	0.910726
0.5	0.25	0.7	0.9	0.7	0.911162
0.5	0.25	0.7	0.9	0.8	0.911307
0.5	0.25	0.7	0.9	0.9	0.912516
0.5	0.25	0.7	0.9	1	0.905406
0.5	0.25	0.8	0.1	0	0.89605
0.5	0.25	0.8	0.1	0.1	0.899956
0.5	0.25	0.8	0.1	0.2	0.901473
0.5	0.25	0.8	0.1	0.3	0.902363
0.5	0.25	0.8	0.1	0.4	0.902823
0.5	0.25	0.8	0.1	0.5	0.903672
0.5	0.25	0.8	0.1	0.6	0.903603
0.5	0.25	0.8	0.1	0.7	0.903731
0.5	0.25	0.8	0.1	0.8	0.904084
0.5	0.25	0.8	0.1	0.9	0.903224
0.5	0.25	0.8	0.1	1	0.903263
0.5	0.25	0.8	0.2	0	0.900433
0.5	0.25	0.8	0.2	0.1	0.904541
0.5	0.25	0.8	0.2	0.2	0.906123
0.5	0.25	0.8	0.2	0.3	0.907519
0.5	0.25	0.8	0.2	0.4	0.908254
0.5	0.25	0.8	0.2	0.5	0.90891
0.5	0.25	0.8	0.2	0.6	0.909241
0.5	0.25	0.8	0.2	0.7	0.909438
0.5	0.25	0.8	0.2	0.8	0.909001
0.5	0.25	0.8	0.2	0.9	0.909276
0.5	0.25	0.8	0.2	1	0.907868
0.5	0.25	0.8	0.3	0	0.902707
0.5	0.25	0.8	0.3	0.1	0.907137
0.5	0.25	0.8	0.3	0.2	0.908752
0.5	0.25	0.8	0.3	0.3	0.909897
0.5	0.25	0.8	0.3	0.4	0.910526
0.5	0.25	0.8	0.3	0.5	0.911516
0.5	0.25	0.8	0.3	0.6	0.911751
0.5	0.25	0.8	0.3	0.7	0.912919
0.5	0.25	0.8	0.3	0.8	0.912564
0.5	0.25	0.8	0.3	0.9	0.912155
0.5	0.25	0.8	0.3	1	0.909105
0.5	0.25	0.8	0.4	0	0.903892
0.5	0.25	0.8	0.4	0.1	0.908484
0.5	0.25	0.8	0.4	0.2	0.910092
0.5	0.25	0.8	0.4	0.3	0.91068
0.5	0.25	0.8	0.4	0.4	0.911607
0.5	0.25	0.8	0.4	0.5	0.912122
0.5	0.25	0.8	0.4	0.6	0.912881
0.5	0.25	0.8	0.4	0.7	0.913848
0.5	0.25	0.8	0.4	0.8	0.914068
0.5	0.25	0.8	0.4	0.9	0.913589
0.5	0.25	0.8	0.4	1	0.909967
0.5	0.25	0.8	0.5	0	0.904651
0.5	0.25	0.8	0.5	0.1	0.908846
0.5	0.25	0.8	0.5	0.2	0.910777
0.5	0.25	0.8	0.5	0.3	0.911382
0.5	0.25	0.8	0.5	0.4	0.911832
0.5	0.25	0.8	0.5	0.5	0.912558
0.5	0.25	0.8	0.5	0.6	0.913526
0.5	0.25	0.8	0.5	0.7	0.913711
0.5	0.25	0.8	0.5	0.8	0.914728
0.5	0.25	0.8	0.5	0.9	0.914558
0.5	0.25	0.8	0.5	1	0.909487
0.5	0.25	0.8	0.6	0	0.90503
0.5	0.25	0.8	0.6	0.1	0.909226
0.5	0.25	0.8	0.6	0.2	0.910905
0.5	0.25	0.8	0.6	0.3	0.911325
0.5	0.25	0.8	0.6	0.4	0.912575
0.5	0.25	0.8	0.6	0.5	0.912881
0.5	0.25	0.8	0.6	0.6	0.913469
0.5	0.25	0.8	0.6	0.7	0.913574
0.5	0.25	0.8	0.6	0.8	0.914481
0.5	0.25	0.8	0.6	0.9	0.914744
0.5	0.25	0.8	0.6	1	0.909901
0.5	0.25	0.8	0.7	0	0.905497
0.5	0.25	0.8	0.7	0.1	0.909854
0.5	0.25	0.8	0.7	0.2	0.910751
0.5	0.25	0.8	0.7	0.3	0.911534
0.5	0.25	0.8	0.7	0.4	0.911776
0.5	0.25	0.8	0.7	0.5	0.912445
0.5	0.25	0.8	0.7	0.6	0.913073
0.5	0.25	0.8	0.7	0.7	0.913235
0.5	0.25	0.8	0.7	0.8	0.914041
0.5	0.25	0.8	0.7	0.9	0.915159
0.5	0.25	0.8	0.7	1	0.908435
0.5	0.25	0.8	0.8	0	0.905383
0.5	0.25	0.8	0.8	0.1	0.908998
0.5	0.25	0.8	0.8	0.2	0.909636
0.5	0.25	0.8	0.8	0.3	0.910912
0.5	0.25	0.8	0.8	0.4	0.911178
0.5	0.25	0.8	0.8	0.5	0.911662
0.5	0.25	0.8	0.8	0.6	0.911847
0.5	0.25	0.8	0.8	0.7	0.912492
0.5	0.25	0.8	0.8	0.8	0.913372
0.5	0.25	0.8	0.8	0.9	0.913854
0.5	0.25	0.8	0.8	1	0.906599
0.5	0.25	0.8	0.9	0	0.904717
0.5	0.25	0.8	0.9	0.1	0.908095
0.5	0.25	0.8	0.9	0.2	0.908878
0.5	0.25	0.8	0.9	0.3	0.909563
0.5	0.25	0.8	0.9	0.4	0.909926
0.5	0.25	0.8	0.9	0.5	0.910702
0.5	0.25	0.8	0.9	0.6	0.910564
0.5	0.25	0.8	0.9	0.7	0.910759
0.5	0.25	0.8	0.9	0.8	0.910904
0.5	0.25	0.8	0.9	0.9	0.911871
0.5	0.25	0.8	0.9	1	0.902658
0.5	0.25	0.9	0.1	0	0.89605
0.5	0.25	0.9	0.1	0.1	0.899957
0.5	0.25	0.9	0.1	0.2	0.901394
0.5	0.25	0.9	0.1	0.3	0.90236
0.5	0.25	0.9	0.1	0.4	0.902905
0.5	0.25	0.9	0.1	0.5	0.903831
0.5	0.25	0.9	0.1	0.6	0.903496
0.5	0.25	0.9	0.1	0.7	0.903971
0.5	0.25	0.9	0.1	0.8	0.904163
0.5	0.25	0.9	0.1	0.9	0.903464
0.5	0.25	0.9	0.1	1	0.902618
0.5	0.25	0.9	0.2	0	0.900433
0.5	0.25	0.9	0.2	0.1	0.904299
0.5	0.25	0.9	0.2	0.2	0.906042
0.5	0.25	0.9	0.2	0.3	0.907358
0.5	0.25	0.9	0.2	0.4	0.908174
0.5	0.25	0.9	0.2	0.5	0.908588
0.5	0.25	0.9	0.2	0.6	0.908841
0.5	0.25	0.9	0.2	0.7	0.909279
0.5	0.25	0.9	0.2	0.8	0.90878
0.5	0.25	0.9	0.2	0.9	0.908793
0.5	0.25	0.9	0.2	1	0.907303
0.5	0.25	0.9	0.3	0	0.902707
0.5	0.25	0.9	0.3	0.1	0.907056
0.5	0.25	0.9	0.3	0.2	0.908591
0.5	0.25	0.9	0.3	0.3	0.909817
0.5	0.25	0.9	0.3	0.4	0.910446
0.5	0.25	0.9	0.3	0.5	0.911355
0.5	0.25	0.9	0.3	0.6	0.911509
0.5	0.25	0.9	0.3	0.7	0.912436
0.5	0.25	0.9	0.3	0.8	0.912001
0.5	0.25	0.9	0.3	0.9	0.911834
0.5	0.25	0.9	0.3	1	0.90862
0.5	0.25	0.9	0.4	0	0.903892
0.5	0.25	0.9	0.4	0.1	0.908403
0.5	0.25	0.9	0.4	0.2	0.910011
0.5	0.25	0.9	0.4	0.3	0.910519
0.5	0.25	0.9	0.4	0.4	0.911688
0.5	0.25	0.9	0.4	0.5	0.912042
0.5	0.25	0.9	0.4	0.6	0.912639
0.5	0.25	0.9	0.4	0.7	0.913929
0.5	0.25	0.9	0.4	0.8	0.913666
0.5	0.25	0.9	0.4	0.9	0.913187
0.5	0.25	0.9	0.4	1	0.909485
0.5	0.25	0.9	0.5	0	0.904651
0.5	0.25	0.9	0.5	0.1	0.908766
0.5	0.25	0.9	0.5	0.2	0.910696
0.5	0.25	0.9	0.5	0.3	0.911301
0.5	0.25	0.9	0.5	0.4	0.911752
0.5	0.25	0.9	0.5	0.5	0.912397
0.5	0.25	0.9	0.5	0.6	0.913284
0.5	0.25	0.9	0.5	0.7	0.91363
0.5	0.25	0.9	0.5	0.8	0.91481
0.5	0.25	0.9	0.5	0.9	0.914318
0.5	0.25	0.9	0.5	1	0.909161
0.5	0.25	0.9	0.6	0	0.90503
0.5	0.25	0.9	0.6	0.1	0.909145
0.5	0.25	0.9	0.6	0.2	0.910744
0.5	0.25	0.9	0.6	0.3	0.911245
0.5	0.25	0.9	0.6	0.4	0.912252
0.5	0.25	0.9	0.6	0.5	0.912559
0.5	0.25	0.9	0.6	0.6	0.913066
0.5	0.25	0.9	0.6	0.7	0.913332
0.5	0.25	0.9	0.6	0.8	0.914562
0.5	0.25	0.9	0.6	0.9	0.914502
0.5	0.25	0.9	0.6	1	0.909578
0.5	0.25	0.9	0.7	0	0.905497
0.5	0.25	0.9	0.7	0.1	0.909854
0.5	0.25	0.9	0.7	0.2	0.910751
0.5	0.25	0.9	0.7	0.3	0.911373
0.5	0.25	0.9	0.7	0.4	0.911776
0.5	0.25	0.9	0.7	0.5	0.912284
0.5	0.25	0.9	0.7	0.6	0.912751
0.5	0.25	0.9	0.7	0.7	0.912831
0.5	0.25	0.9	0.7	0.8	0.91388
0.5	0.25	0.9	0.7	0.9	0.914837
0.5	0.25	0.9	0.7	1	0.908034
0.5	0.25	0.9	0.8	0	0.905383
0.5	0.25	0.9	0.8	0.1	0.908998
0.5	0.25	0.9	0.8	0.2	0.909556
0.5	0.25	0.9	0.8	0.3	0.910751
0.5	0.25	0.9	0.8	0.4	0.911178
0.5	0.25	0.9	0.8	0.5	0.911639
0.5	0.25	0.9	0.8	0.6	0.912008
0.5	0.25	0.9	0.8	0.7	0.912412
0.5	0.25	0.9	0.8	0.8	0.91313
0.5	0.25	0.9	0.8	0.9	0.913532
0.5	0.25	0.9	0.8	1	0.905876
0.5	0.25	0.9	0.9	0	0.904717
0.5	0.25	0.9	0.9	0.1	0.908175
0.5	0.25	0.9	0.9	0.2	0.90912
0.5	0.25	0.9	0.9	0.3	0.909805
0.5	0.25	0.9	0.9	0.4	0.910168
0.5	0.25	0.9	0.9	0.5	0.911024
0.5	0.25	0.9	0.9	0.6	0.911048
0.5	0.25	0.9	0.9	0.7	0.911243
0.5	0.25	0.9	0.9	0.8	0.911549
0.5	0.25	0.9	0.9	0.9	0.912193
0.5	0.25	0.9	0.9	1	0.903621
